# Supplementary material for: An effective utilization of MXene and its effect on electromagnetic interference shielding: flexible, free-standing and thermally conductive composite from MXene–PAT–poly(p-aminophenol)–polyaniline co-polymer
Source: Royal Society of Chemistry journal article supplement (doi:10.1039/c9ra09522e), 2020-01-01
Supplement: c9ra09522e1.pdf [file c9ra09522e1.pdf]

*Supplementary text*

**An effective utilization of MXene and its effect on electromagnetic interference shielding: flexible, free standing and thermally conductive composite from MXene-PAT-Poly(p-aminophenol)-polyaniline co-polymer.**

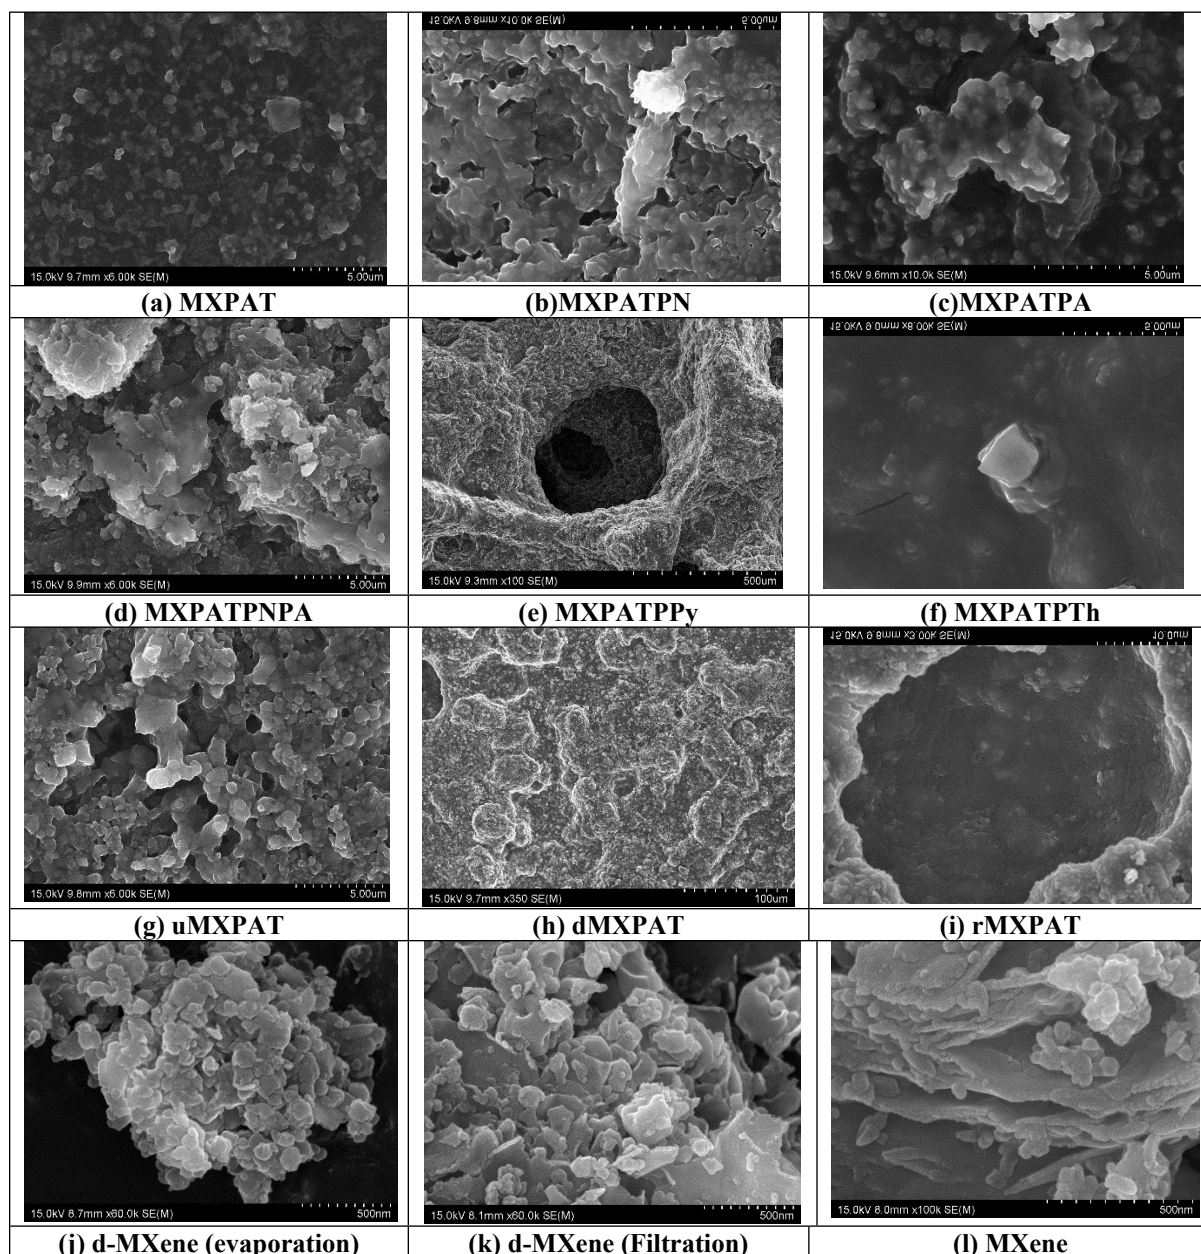

**Figure S1.** The topology of the composite and MXene under the scanning electron microscope.

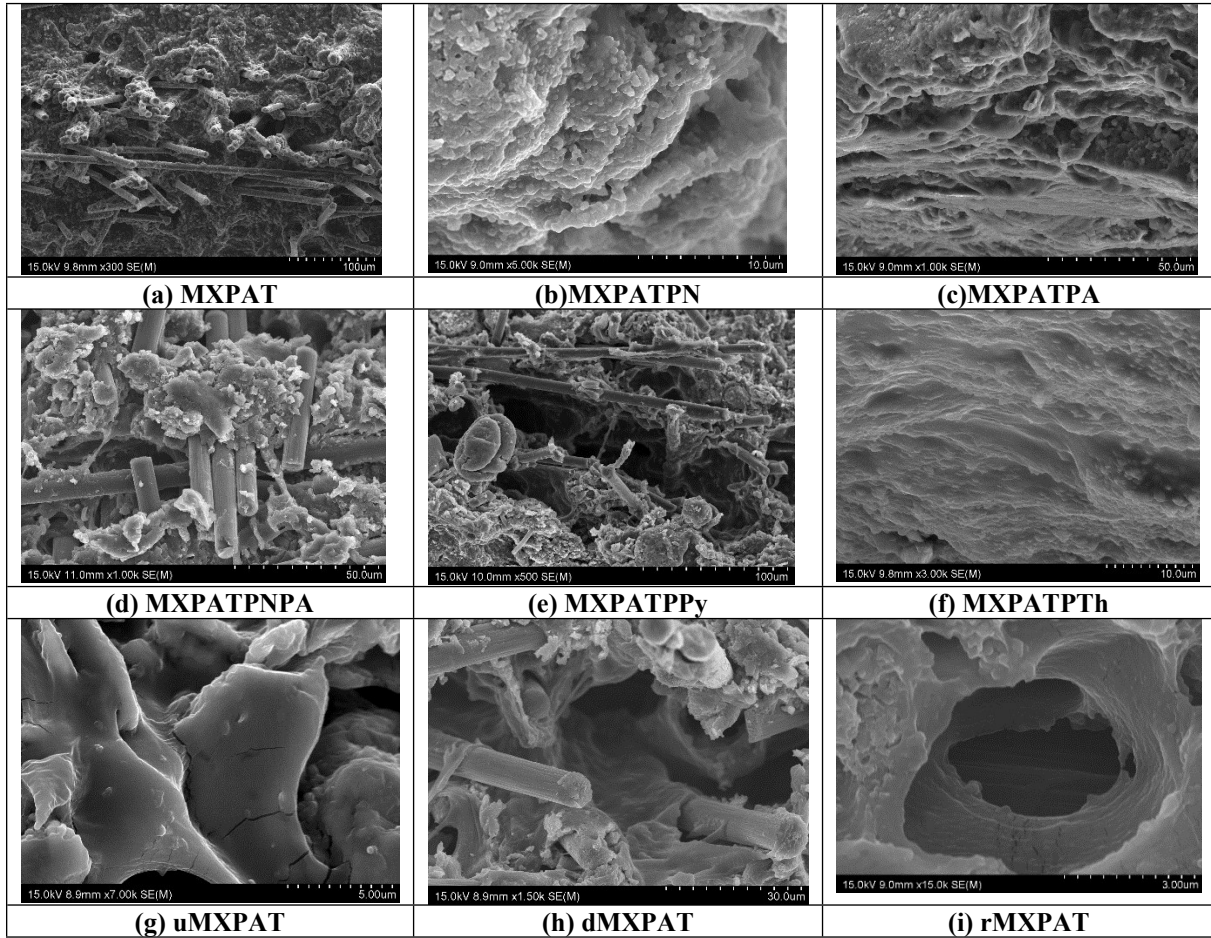

**Figure S2.** The cross-section of the composite under the scanning electron microscope.

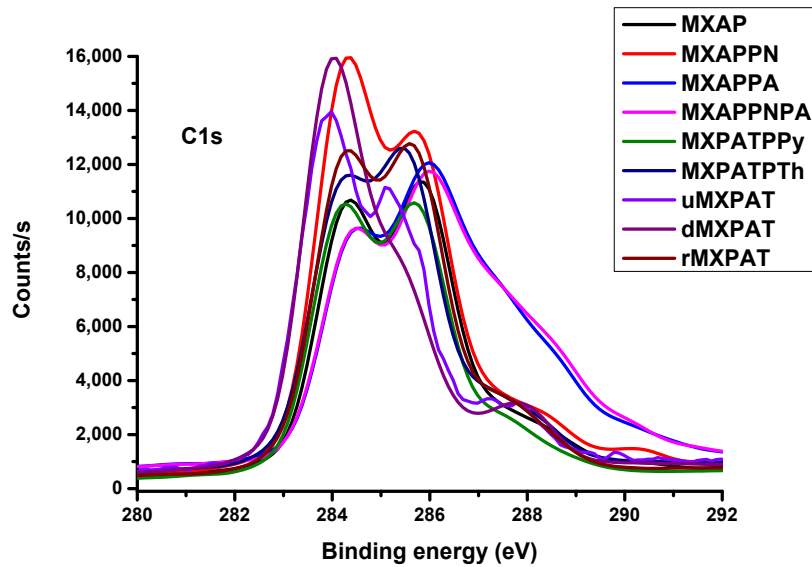

**Figure S3.** XPS O1s Overlapping curve of composites

**Table S1.** Elemental percentage of composites from XPS

| Nos | Composites | C1s % | Ti2p % | O1s % | F1s % | N1s % | S2p % |
|-----|------------|-------|--------|-------|-------|-------|-------|
|-----|------------|-------|--------|-------|-------|-------|-------|

|   |                    |       |      |       |      |      |      |
|---|--------------------|-------|------|-------|------|------|------|
| 1 | MXPAT              | 65.51 | 0.49 | 32.4  | 1.6  | -    | -    |
| 2 | MXPATPN            | 67.24 | 0.68 | 27.6  | 2.53 | 1.94 | -    |
| 3 | PXPATPA            | 62.75 | 0.57 | 32.07 | 1.79 | 2.83 | -    |
| 4 | MXPATPNPA          | 62.94 | 0.55 | 31.84 | 1.54 | 3.14 | -    |
| 5 | MXPATPPy           | 62.35 | 1.04 | 32.78 | 1.76 | 2.07 | -    |
| 6 | MXPATPTh           | 62.43 | 0.41 | 34.09 | 0.74 | -    | 2.32 |
| 7 | uMXPAT             | 65.27 | 0.68 | 31.18 | 2.88 | -    | -    |
| 8 | dMXPA <sub>t</sub> | 70.5  | 0.71 | 27.38 | 1.41 | -    | -    |
| 9 | rMXPAT             | 62.81 | 0.33 | 34.74 | 2.11 | -    | -    |

**Table S2.** Peak position of elements in composites from XPS

| Elements | MXPAT  | MXPAT  | MXPAT  | MXPATP       | MXPAT  | MXPAT  | uMXPAT | dMXPAT | rMXPAT |
|----------|--------|--------|--------|--------------|--------|--------|--------|--------|--------|
|          | AT     | PN     | PA     | NPA          | PPy    | PTh    | AT     | AT     | AT     |
| C1s      | 285.66 | 284.49 | 285.78 | 285.84458.31 | 285.1  | 285.14 | 284.12 | 284.05 | 284.66 |
| Ti2p     | 474.98 | 458.55 | 458.87 | 532.49       | 448.18 | 457.24 | 457.9  | 457.99 | 460.91 |
| O1s      | 544.98 | 532.12 | 532.5  | 687.49       | 525.18 | 531.78 | 531.41 | 531.31 | 531.97 |
| F1s      | 697.98 | 687.36 | 687.51 | 401.44       | 678.18 | 683.72 | 684.72 | 684.89 | 685.18 |
| N1s      | -      | 399.48 | 401.49 | -            | 399.5  | -      | -      | -      | -      |
| S2p      | -      | -      | -      | -            | -      | 167.75 | -      | -      | -      |

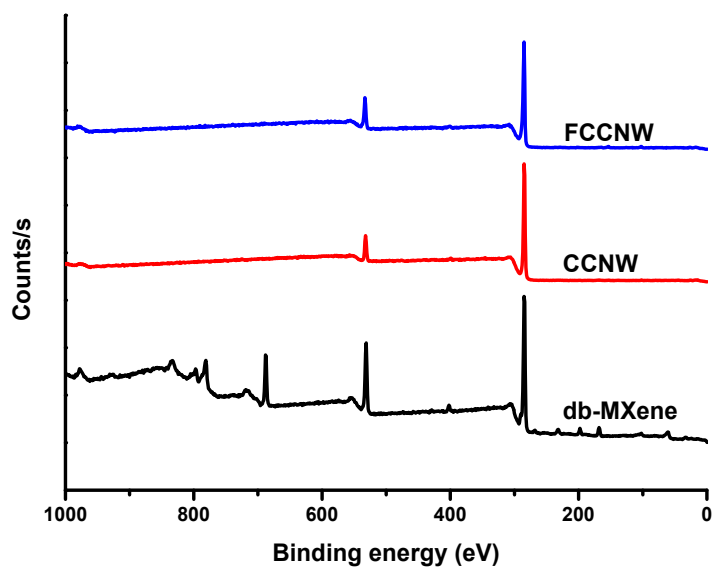

**Figure S4.** XPS of FCCNW, CCNW and db-MXene

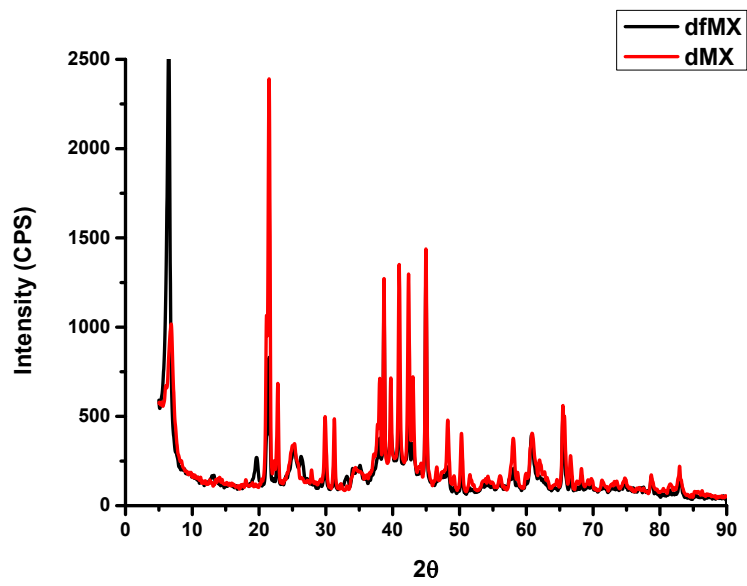

(a)

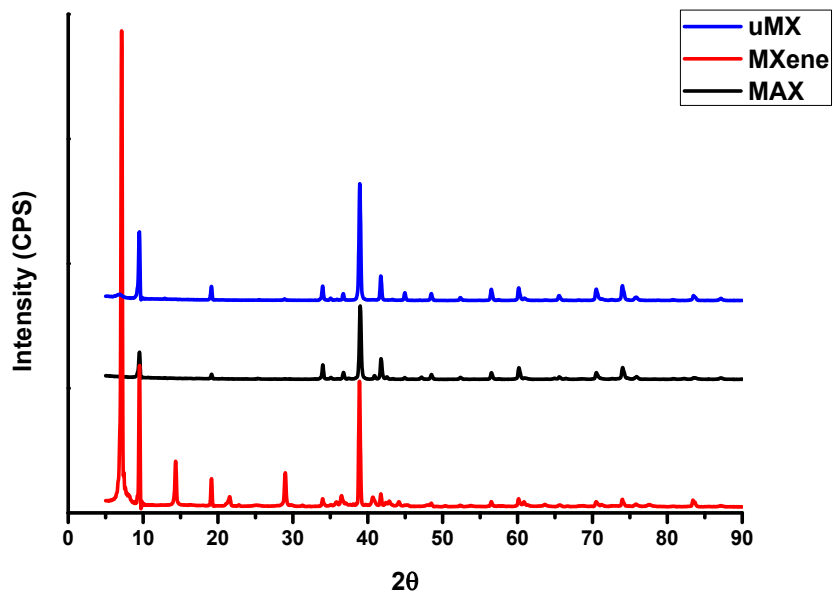

(b)

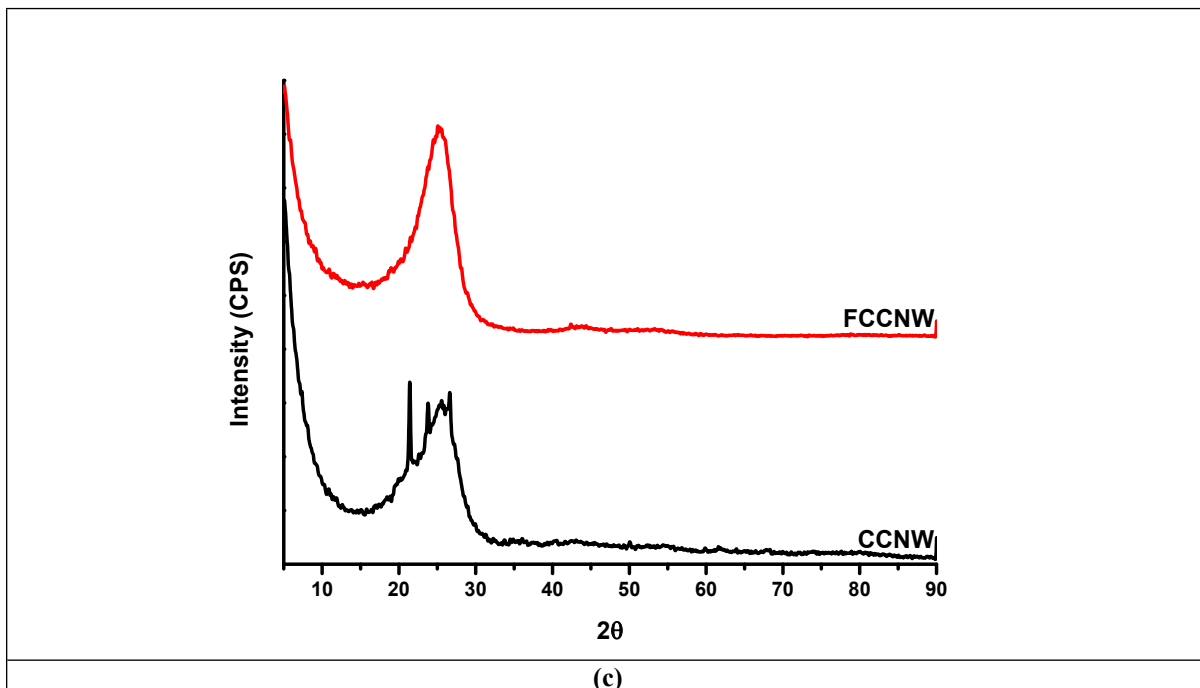

Figure S5. XRD of df-MXene, d-MXene, u-MXene, MAX phase, CCNW and FCCNW.

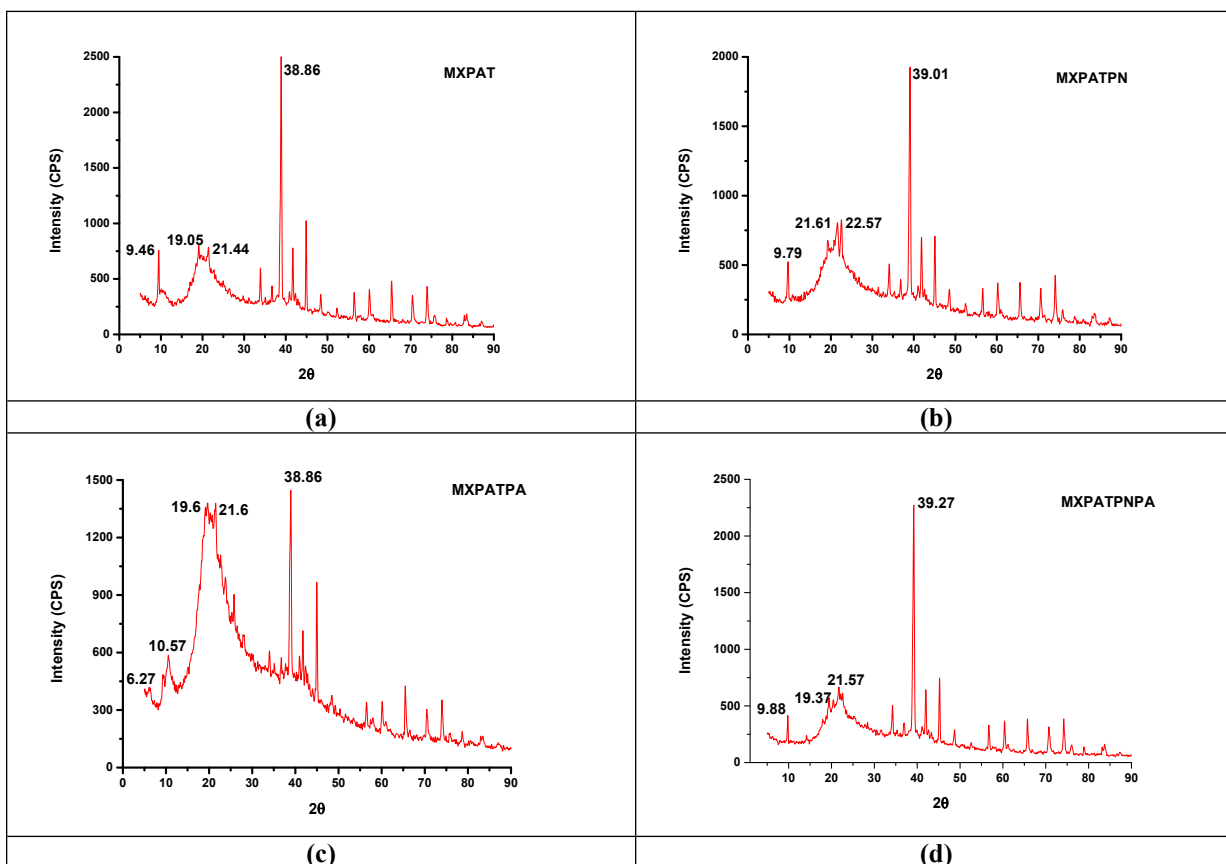

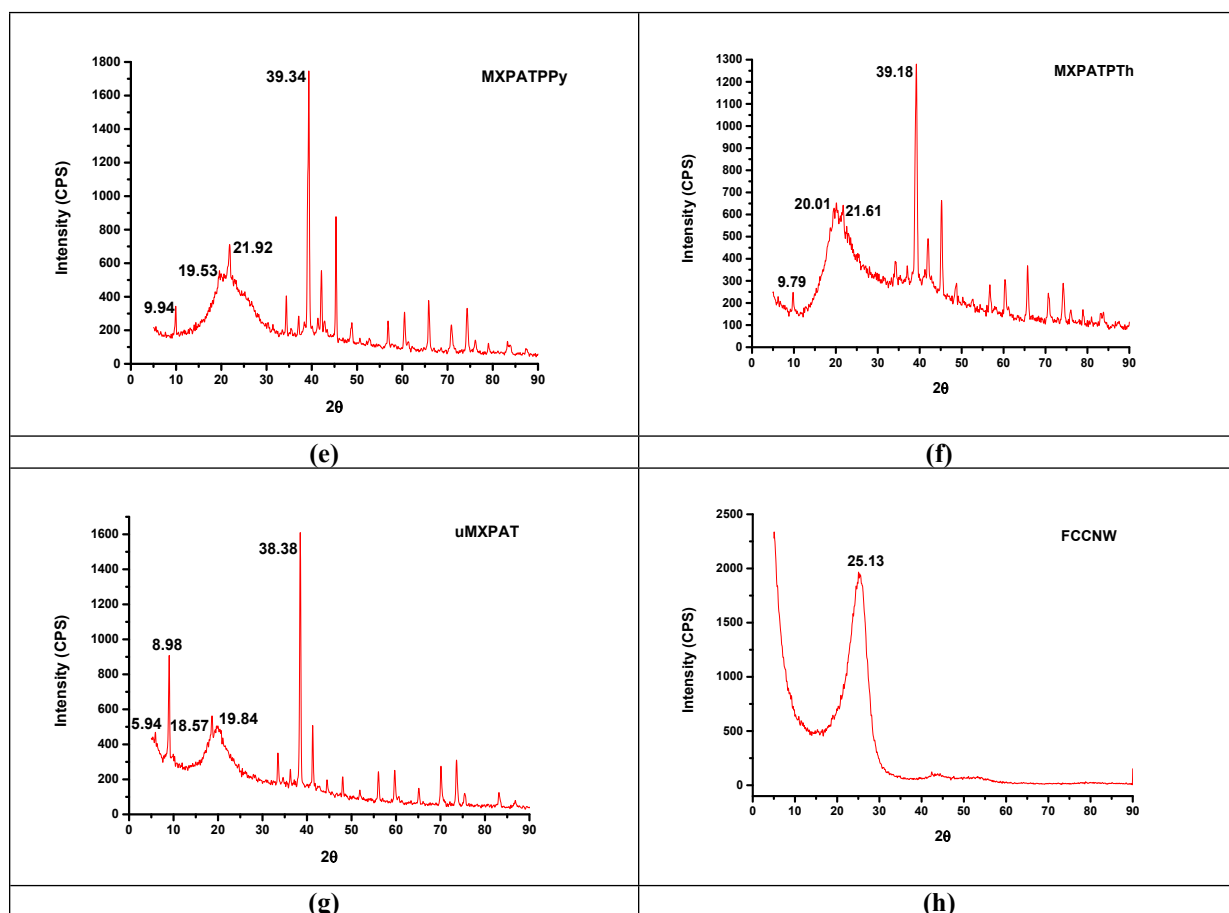

Figure S6. XRD of composites

Table S3. XRD peaks of composites

| Composites | Peak positions ( $2\theta$ angle) |                                 |                                                                                                                                                                  |
|------------|-----------------------------------|---------------------------------|------------------------------------------------------------------------------------------------------------------------------------------------------------------|
| MXPAT      | 9.46                              | 19.05, 21.44                    | 33.92, 36.78, 38.78, <u>38.86</u> , 41.74, 44.93, 48.45, 50.35, 52.28, 56.43, 60.10, 65.39, 70.33, 74.00, 75.77, 78.64, 82.79, 83.44, 87.11                      |
| MXPATPN    | 9.79                              | 18.4, 19.36, 21.61, 22.57, 25.9 | 34.1, 36.93, <u>39.01</u> , 41.89, 45.08, 48.61, 52.45, 56.60, 60.28, 65.54, 70.66, 74.18, 75.77, 78.81, 80.88, 83.60, 87.27                                     |
| MXPATPA    | 6.27, 10.57                       | 19.6, 21.6, 23.9, 25.8          | 33.92, 35.03, 36.63, <u>38.86</u> , 40.93, 41.74, 44.93, 48.45, 56.60, 57.87, 60.10, 65.54, 70.50, 74.00, 75.77, 78.64, 83.27, 87.12                             |
| MXPATPNPA  | 9.88                              | 19.37, 20.47, 21.57, 22.67      | 28.53, 31.69, 34.22, 35.32, 36.89, <u>39.27</u> , 41.95, 45.11, 48.74, 52.69, 56.89, 60.43, 65.82, 70.87, 74.18, 76.08, 78.93, 83.82, 87.45                      |
| MXPATPPy   | 9.94                              | 19.53, 21.92, 25.3, 25.9        | 34.39, 35.51, 37.11, <u>39.34</u> , 41.26, 42.22, 43.01, 45.41, 48.93, 50.68, 52.60, 56.91, 60.58, 65.87, 68.74, 70.97, 74.33, 76.25, 78.96, 83.27, 87.59        |
| MXPATPTh   | 9.79                              | 20.01, 21.61                    | 34.22, 35.33, 36.39, <u>39.18</u> , 42.05, 45.26, 48.76, 50.35, 52.60, 54.53, 56.76, 60.43, 65.70, 70.66, 74.33, 76.01, 78.96, 81.04, 83.27, 83.27, 83.92, 87.60 |
| uMXPAT     | 5.94, 8.98                        | 18.57, 19.84                    | 33.44, 34.71, 36.15, <u>38.38</u> , 41.26, 44.45, 48.12, 51.97, 56.12, 59.79, 65.22, 70.18, 73.52, 75.29, 83.12, 86.94                                           |

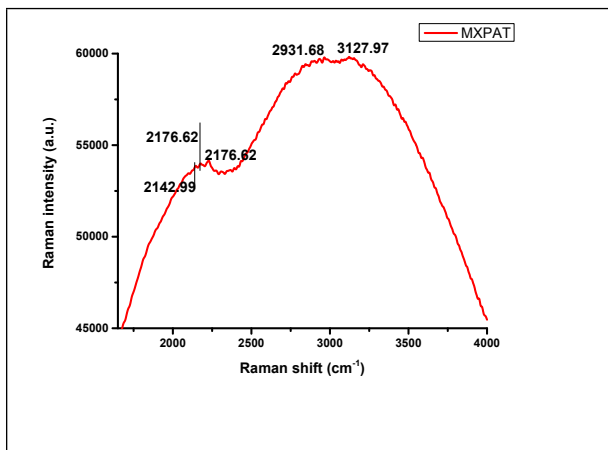

(a)

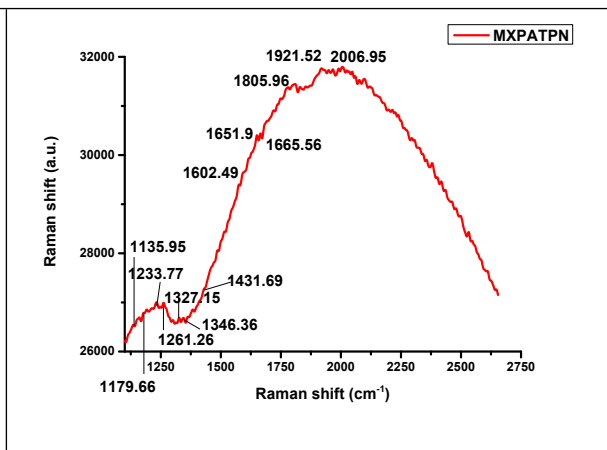

(b)

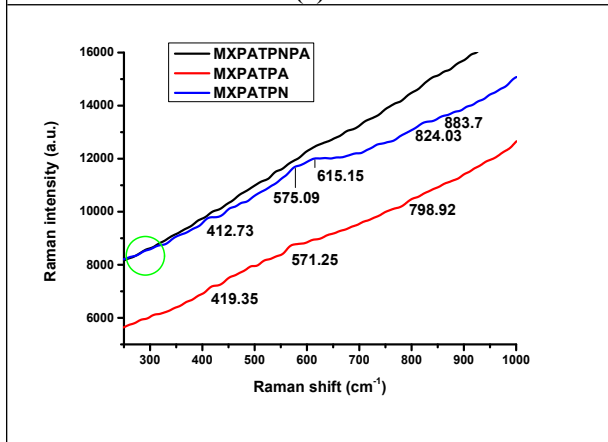

(c)

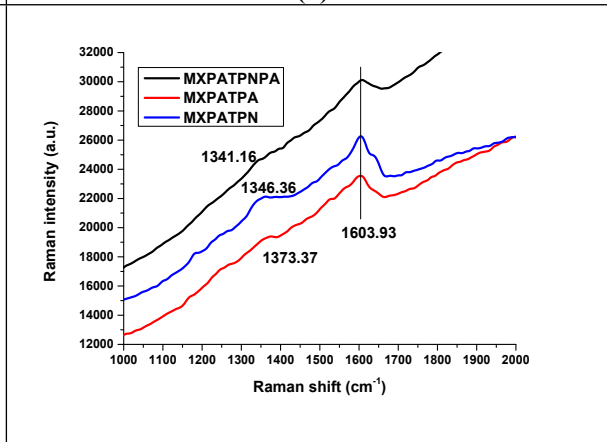

(d)

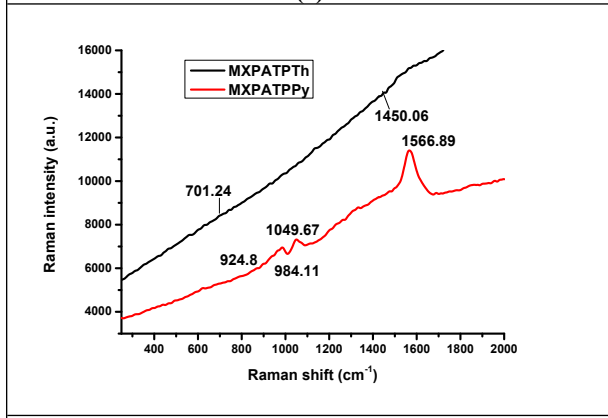

(e)

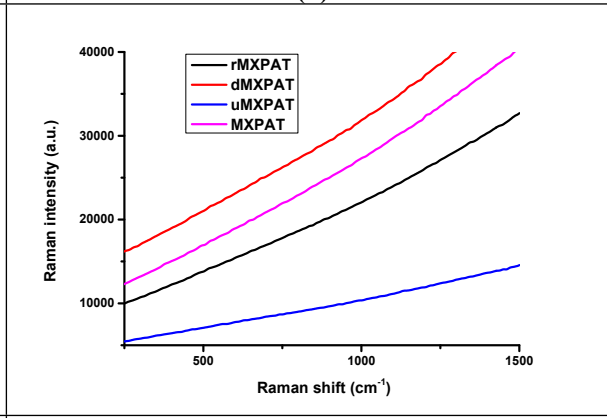

(f)

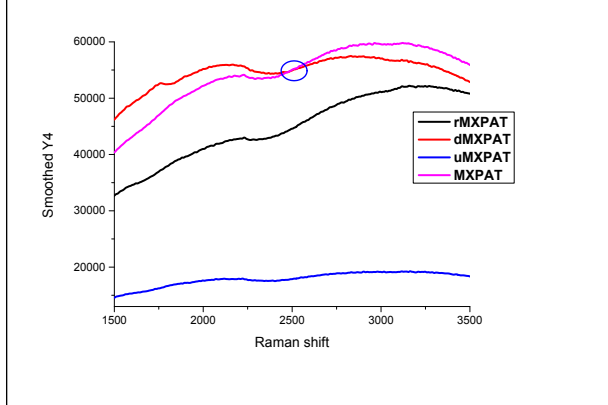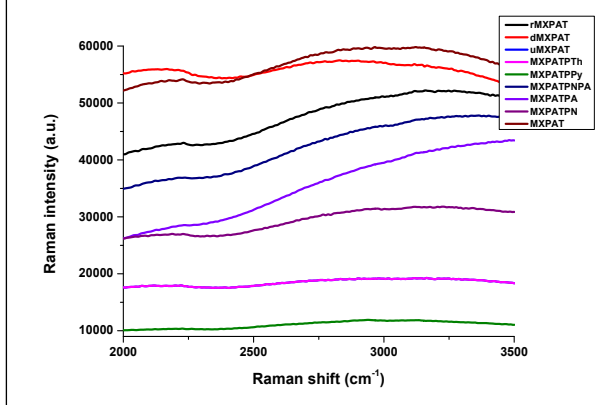

**(h)****(i)****Figure S7.** Raman spectra comparison of composite in different range.**Table S4.** Peak position of Raman shift

| Composites | Peak positions (cm <sup>-1</sup> )                                                                                                                                    |
|------------|-----------------------------------------------------------------------------------------------------------------------------------------------------------------------|
| MXPAT      | 2176.62, 2931.68, 2230.85, 3127.97                                                                                                                                    |
| MXPATPN    | 412.73, 824.03, 883.7, 1135.95, 1179.66, 1327.15, 1346.36, 1431.69, 1602.49, 1651.99, 1665.56, 1805.96, 1921.52, 2006.95, 2183.51, 2774.51, 2969.56, 3121.13, 3223.35 |
| MXPATPA    | 1373.37, 1597.79, 2217.58, 3125.83                                                                                                                                    |
| MXPATPNPA  | 1608.20, 2215.77, 3009.19, 3350.14                                                                                                                                    |
| MXPATPPY   | 984.11, 1049.67, 1566.89, 2221.85, 2937.75, 3129.80                                                                                                                   |
| MXPATPTh   | 2117.92, 2224.20, 2903.55, 3169.52                                                                                                                                    |
| uMXPAT     | 2109.29, 2072.44, 2219.35, 2905.28, 3162.74                                                                                                                           |
| dMXPAT     | 1761.03, 2144.29, 2827.47, 3117.97                                                                                                                                    |
| rMXPAT     | 2238.50, 3163.90                                                                                                                                                      |

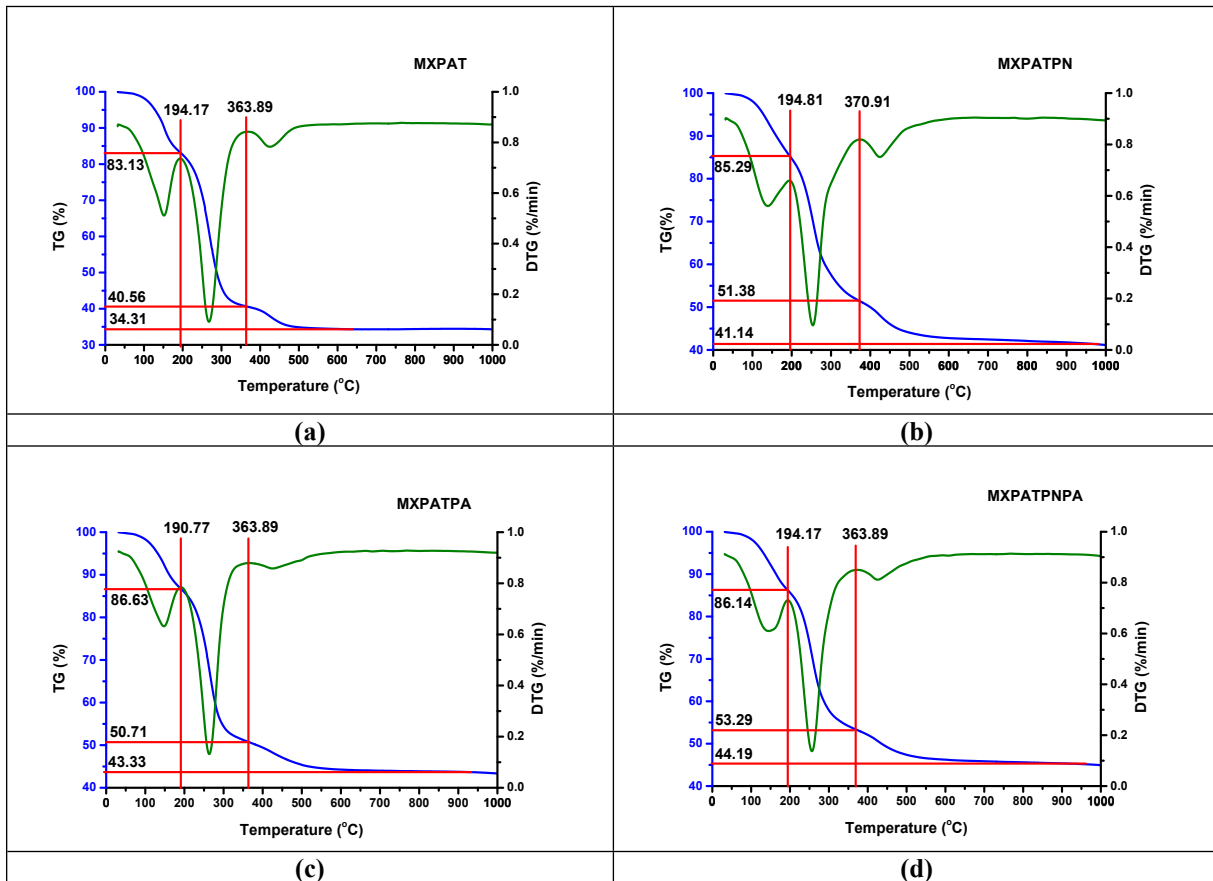



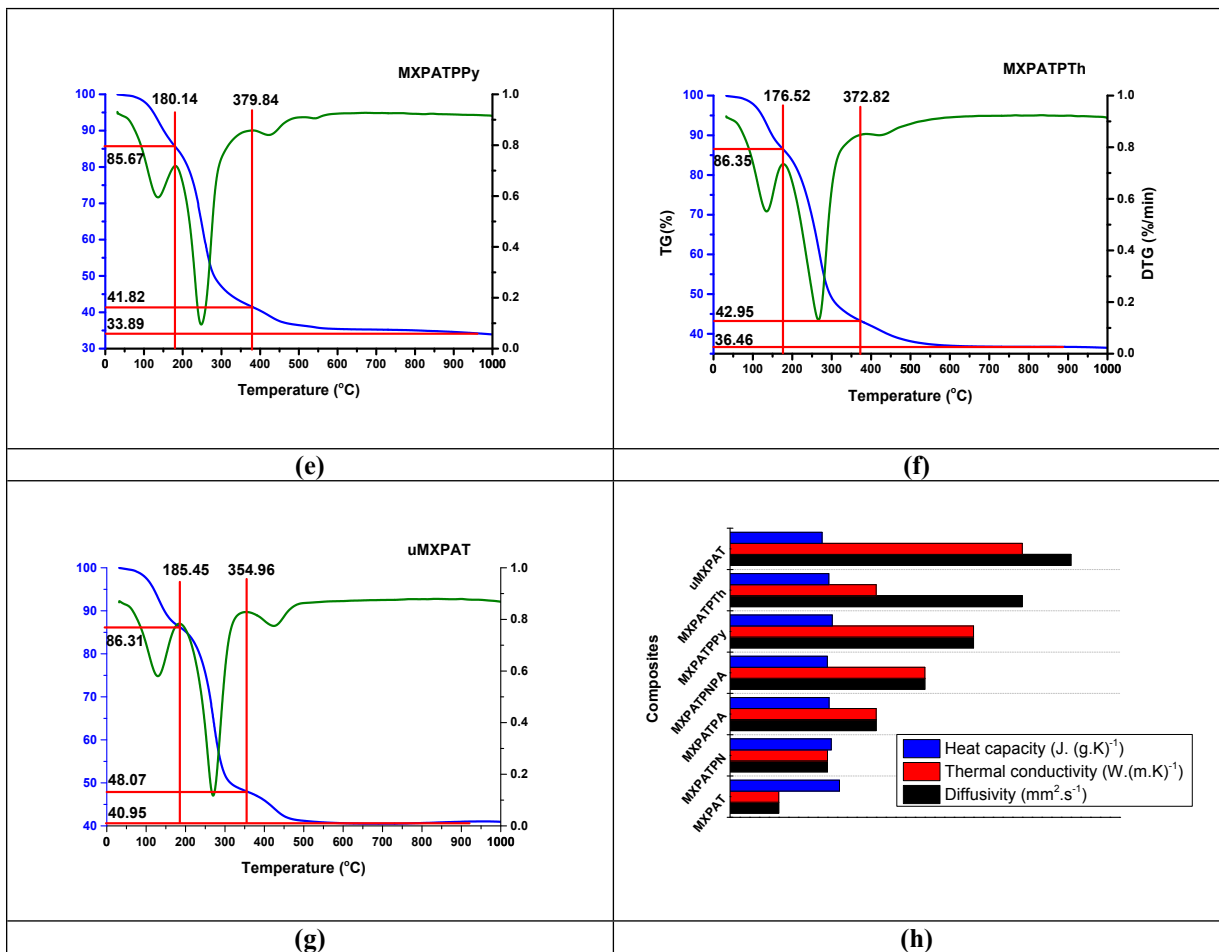

**Figure S8.** (a-g) TGA and DTG analysis of composites (h) Thermal diffusivity, thermal conductivity and Heat capacity of the composites.

**Table S5.** Thermogravimetric analysis (TG) of the composites

| Composites | Temperature   | Total weight loss (%) |
|------------|---------------|-----------------------|
| MXPAT      | 30-194.17     | 16.81                 |
|            | 194.17-363.89 | 59.44                 |
|            | 363.89-1000   | 65.69                 |
| MXPATPN    | 30-194.81     | 14.71                 |
|            | 194.81-370.91 | 48.62                 |
|            | 370.91-1000   | 58.86                 |
| MXPATPA    | 30-190.77     | 13.37                 |
|            | 190.77-363.89 | 49.29                 |
|            | 363.89-1000   | 56.67                 |
| MXPATPNPA  | 30-194.17     | 13.86                 |
|            | 194.17-363.89 | 46.71                 |
|            | 363.89-1000   | 55.09                 |
| MXPATPPy   | 30-180.14     | 14.33                 |
|            | 180.14-379.84 | 58.18                 |
|            | 379.84-1000   | 66.11                 |
| MXPATPTh   | 30-176.52     | 13.65                 |
|            | 176.52-372.82 | 57.05                 |
|            | 372.82-1000   | 63.54                 |
| uMXPAT     | 30-185.45     | 13.69                 |
|            | 185.45-354.96 | 51.93                 |
|            | 354.96-1000   | 59.05                 |

**Table S6.** Derivative Thermogravimetry (DTG) analysis

| Composites | Endothermic peaks      | Exothermic peaks |
|------------|------------------------|------------------|
| MXPAT      | 151.85, 266.69, 424.08 | 194.17, 363.89   |
| MXPATPN    | 139.52, 254.36, 424.08 | 194.81, 370.91   |
| MXPATPA    | 146.53, 263.08, 424.08 | 190.77, 363.89   |
| MXPATPNPA  | 146.53, 256.06, 424.08 | 194.17, 363.89   |
| MXPATPPy   | 135.90, 247.34, 424.08 | 180.14, 379.84   |
| MXPATPTh   | 134.20, 266.70, 424.08 | 176.52, 372.82   |
| uMXPAT     | 128.88, 270.31, 424.08 | 185.45, 354.96   |

**Table S7.** SE of fabricated composites

| SE(dB)                                          | MXPA<br>T | MXPA<br>TPN | MXPA<br>TPA | MXPATP<br>NPA | MXPAT<br>PPy | MXPAT<br>PTh | uMXP<br>AT | dMXP<br>AT | rMXPA<br>T |
|-------------------------------------------------|-----------|-------------|-------------|---------------|--------------|--------------|------------|------------|------------|
| MAX                                             | 41.31     | 39.33       | 45.18       | 44.08         | 41.31        | 42.99        | 39.69      | 43.74      | 44.31      |
| MIN                                             | 38.55     | 37.83       | 39.00       | 37.87         | 39.65        | 40.25        | 36.04      | 41.54      | 39.94      |
| Average                                         | 39.29     | 38.24       | 40.48       | 40.96         | 40.00        | 41.44        | 37.25      | 42.40      | 42.15      |
| SSE<br>(dB.g <sup>-1</sup> .cm <sup>3</sup> )   | 29.95     | 27.99       | 33.26       | 31.98         | 40.49        | 33.10        | 28.85      | -          | -          |
| SSE/t<br>(dB.g <sup>-1</sup> .cm <sup>2</sup> ) | 575.96    | 321.72      | 236.45      | 399.75        | 253.06       | 359.78       | 721.25     | -          | -          |
| SE/t<br>(dB.m<br>m <sup>-1</sup> )              | 1.463     | 1.393       | 1.6         | 1.561         | 1.463        | 1.522        | 1.406      | 1.549      | 1.569      |

**Table S8.** SE<sub>A</sub> of fabricated composites

| SE <sub>A</sub><br>(dB) | MXPA<br>T | MXPA<br>TPN | MXPA<br>TPA | MXPATP<br>NPA | MXPATP<br>Py | MXPAT<br>PTh | uMXP<br>AT | dMXP<br>AT | rMXPA<br>T |
|-------------------------|-----------|-------------|-------------|---------------|--------------|--------------|------------|------------|------------|
| Max                     | 30.58     | 30.44       | 34.85       | 36.56         | 37.57        | 34.87        | 29.99      | 34.48      | 34.09      |
| Min                     | 28.25     | 29.37       | 29.81       | 29.46         | 36.46        | 30.62        | 26.24      | 32.91      | 29.72      |
| Average                 | 29.17     | 29.83       | 31.13       | 33.28         | 36.77        | 32.99        | 27.55      | 33.50      | 32.02      |

**Table S9.** SE<sub>R</sub> of fabricated composites

| SE <sub>R</sub> (dB) | MXPA<br>T | MXPA<br>TPN | MXPA<br>TPA | MXPAT<br>PNPA | MXPA<br>TPPy | MXPA<br>TPTh | uMXP<br>AT | dMXP<br>AT | rMXP<br>AT |
|----------------------|-----------|-------------|-------------|---------------|--------------|--------------|------------|------------|------------|
| MAX                  | 11.44     | 9.84        | 10.34       | 9.09          | 4.71         | 9.77         | 10.11      | 9.77       | 11.43      |
| Min                  | 9.27      | 7.40        | 8.41        | 7.37          | 2.27         | 7.87         | 9.18       | 8.49       | 9.47       |
| Average              | 10.12     | 8.42        | 9.36        | 7.69          | 3.24         | 8.45         | 9.69       | 8.91       | 10.13      |

**Table S10.** The bandwidth comparison at about 99.99% shielding efficiency.

| Composites | EMI SE at 99.99%<br>efficiency (dB) | Maximum point<br>(dB) | Bandwidth (GHz) | Range (GHz) |
|------------|-------------------------------------|-----------------------|-----------------|-------------|
| MXPAT      | 39.88                               | 41.31                 | 8.82-12.4       | 3.58        |
| dMXPAT     | 42.89                               | 43.74                 | 8.24-9.72       | 1.48        |
| rMXPAT     | 41.15                               | 44.31                 | 8.24-11.19      | 2.95        |

|           |       |       |            |      |
|-----------|-------|-------|------------|------|
| uMXPAT    | 39.18 | 39.69 | 8.31-12.4  | 4.09 |
| MXPATPNPA | 38.53 | 44.08 | 8.2-11.98  | 3.78 |
| MXPATPTh  | 40.29 | 42.99 | 8.42-12.36 | 3.94 |
| MXPATPA   | 40.94 | 45.18 | 9.31-12.4  | 3.09 |
| MXPATPPy  | 39.83 | 41.31 | 10.06-12.4 | 2.34 |
| MXPATPN   | 37.82 | 39.33 | 8.2-12.4   | 4.2  |

**Table S11.** EMI shielding comparison of previous work published

|    | Composition                                                          | Polymer matrix | Fillers (%) | Density ( $\text{g}\cdot\text{cm}^{-3}$ ) | t (mm) | SE (dB) | SSE ( $\text{dB}\cdot\text{g}^{-1}\cdot\text{cm}^3$ ) | SSE/t( $\text{dB}\cdot\text{g}^{-1}\cdot\text{cm}^3$ ) | Ref. |
|----|----------------------------------------------------------------------|----------------|-------------|-------------------------------------------|--------|---------|-------------------------------------------------------|--------------------------------------------------------|------|
| 1  | $\text{Ti}_3\text{C}_2\text{T}_x$ /SA                                | SA             | 90          | 2.31                                      | 0.0008 | 57      | 24.6                                                  | 30830                                                  | 1    |
| 2  | $\text{Ti}_3\text{C}_2\text{T}_x$ /CNF                               | Cellulose      | 90          | 2.10                                      | 0.047  | 25.8    | 12.44                                                 | 2647                                                   | 2    |
| 3  | $\text{Ti}_3\text{C}_2\text{T}_x$ areogel                            | Bulk           | MXene       | 0.0055                                    | 1      | 44.8    | 8145.5                                                | 81455.0                                                | 3    |
| 4  | $\text{Ti}_3\text{CNT}_x$                                            | Bulk           | MXene       | 0.0055                                    | 1      | 42.3    | 7690.9                                                | 62909.0                                                | 3    |
| 5  | $\text{Ti}_2\text{CT}_x$                                             | Bulk           | MXene       | 0.0055                                    | 1      | 48.5    | 8818.2                                                | 88182.0                                                | 3    |
| 6  | CNT sponge                                                           | Bulk           | CNT         | 0.018                                     | 2.4    | 20      | 1100.0                                                | 462.2                                                  | 4    |
| 7  | MWCNT/WPU Composites                                                 | WPU            | MWCNT       | 0.02                                      | 2.3    | 23      | 1148.0                                                | 4991.0                                                 | 5    |
| 8  | CNF/Fe <sub>3</sub> O <sub>4</sub>                                   | Epoxy          | 10          | *                                         | 13     | 20      | *                                                     | *                                                      | 6    |
| 9  | rGO/cellulose fiber                                                  | Cellulose      | 50          | 0.0028                                    | 5.0    | 47.8    | 16890.0                                               | 33780.0                                                | 7    |
| 10 | CNT/polycarbonate                                                    | polycarbonate  | 20          | 1.13                                      | 2.1    | 39      | 34.5                                                  | 154.0                                                  | 8    |
| 11 | high structure carbon black (HS-CB)/ABS                              | ABS            | 15          | 0.96                                      | 1.1    | 20      | 20.9                                                  | 190                                                    | 9    |
| 12 | Graphene/polyurethane (PU)                                           | PU             | GN          | 0.030                                     | 60     | 32      | 1066.7                                                | 177.8                                                  | 10   |
| 13 | SWCNT-Polystyrene foam                                               | PS             | 7           | 0.56                                      | 1.2    | 18.5    | 33                                                    | 275                                                    | 11   |
| 14 | carbon black filled EPDM                                             | EPDM           | 37.5        | 0.594                                     | 2      | 18      | 30.3                                                  | 15.1                                                   | 12   |
| 15 | Polypropylene/Stainless-Steel                                        | PP             | 1.1         | 0.64                                      | 3.1    | 48      | 75                                                    | 241.9                                                  | 13   |
| 16 | Polyetherimide/Graphene                                              | PEI            | 10          | 0.291                                     | 2.3    | 12.8    | 44                                                    | 191.3                                                  | 14   |
| 17 | C/MWCNTs/Fe <sub>3</sub> O <sub>4</sub>                              | Phenolic foam  | 7           | 0.126                                     | 5      | 62      | 549                                                   | 1098.7                                                 | 15   |
| 18 | Au/GN/Fe <sub>3</sub> O <sub>4</sub> /poly(dimethyl siloxane) (PDMS) | PDMS           | *           | 0.116                                     | 2      | 30.5    | 263                                                   | 1315                                                   | 16   |
| 19 | Polyimide/reduced graphene                                           | PI             | 16          | 0.022                                     | 0.8    | 21      | 937                                                   | 11712                                                  | 17   |

|                                                                                   |                                              |               |           |       |       |       |        |         |           |
|-----------------------------------------------------------------------------------|----------------------------------------------|---------------|-----------|-------|-------|-------|--------|---------|-----------|
| 20                                                                                | Graphene foam                                | Bulk          | GN        | 0.06  | 0.3   | 25.2  | 420    | 14000   | 18        |
| 21                                                                                | Graphene/PDMS                                | PDMS          | *         | 0.06  | 1     | 30    | 500    | 5000    | 18        |
| 22                                                                                | Graphene-Polystyrene                         | PS            | *         | 0.27  | 2.5   | 17.3  | 64.07  | 256.29  | 18        |
| 23                                                                                | MXCS                                         | CF            | *         | 0.153 | 0.386 | 50.5  | 324.15 | 8397.78 | 19        |
| 24                                                                                | MXCB                                         | CF            | *         | 0.229 | 0.398 | 47.6  | 205.52 | 5163.75 | 19        |
| 25                                                                                | MWCNT/CNF                                    | CNF           | *         | 0.058 | 0.138 | 28.22 | 486.54 | 35256   | 19        |
| 26                                                                                | Copper                                       | Bulk          | Bulk      | 9     | 3.1   | 90    | 10     | 32      | 20        |
| 27                                                                                | Polypropylene/carbon fiber                   | PP            | 10 vol%   | 0.735 | 3.1   | 25    | 34     | 109     | 20        |
| 28                                                                                | Stainless steel                              | Bulk          | Bulk      | 8.091 | 4     | 89    | 11     | 27      | 20        |
| 29                                                                                | Poly(ether sulfonate) (PES)-Nickel filaments | PES           | 7 vol %   | 1.851 | 2.85  | 87    | 47     | 165     | 20        |
| 30                                                                                | PS-Cu nanowire                               | PS            | 2.1Vol %  | *     | 0.21  | 35    | *      | *       | 20        |
| 31                                                                                | MWCNT/polyurethane                           | PU            | 10.6      | *     | 0.4   | 24.7  | *      | *       | 21        |
| 32                                                                                | Ag/PAN                                       | PAN           | 20        | *     | 0.75  | 40    | *      | *       | 22        |
| 33                                                                                | Ag/BaTiO <sub>3</sub>                        | PVDF          | 20        | *     | 1.2   | 21    |        |         | 22        |
| 34                                                                                | Au/MWCNT                                     | PVDF          | 3         | *     | 0.5   | 26.7  | *      | *       | 22        |
| 35                                                                                | GNP/PLLA                                     | PLLA          | 15        | *     | 1.5   | 15.5  | *      | *       | 22        |
| 36                                                                                | MWCNT+PP                                     | PP            | 8         | *     | 3.2   | 29.47 | *      | *       | 23        |
| 37                                                                                | CF+PP                                        | PP            | 18        | *     | 3.2   | 19.8  | *      | *       | 23        |
| 38                                                                                | 1 wt% CNT+30 wt% CF+PP                       | PP            | 31        | *     | 1     | 16    | *      | *       | 23        |
| 39                                                                                | SWCNTs/Epoxy                                 | Epoxy         | 15        | *     | 2     | 25    | *      | *       | 24        |
| 40                                                                                | Graphite/PE                                  | PE            | 18.7 vol% | *     | 3     | 33    | *      | *       | 24        |
| 41                                                                                | MXPATPN                                      | PAT-PpAP      | *         | 1.217 | 0.62  | 45.18 | 33.26  | 236.45  | This work |
| 42                                                                                | MXPATPNPA                                    | PAT-PpAP-PANI | *         | 1.281 | 0.8   | 44.08 | 31.98  | 399.75  |           |
| * indicates that the values were either not available or impossible to calculate. |                                              |               |           |       |       |       |        |         |           |

**Table S12.** The short-listed EMI shielding comparison for graph (Figure 11f)

| Composition                                           | No |        | Polymer matrix | t (mm)   | SE (dB) |
|-------------------------------------------------------|----|--------|----------------|----------|---------|
| Ti <sub>3</sub> C <sub>2</sub> T <sub>x</sub> /SA     | 1  | MX/SA  | SA             | 8.00E-04 | 57      |
| Ti <sub>3</sub> C <sub>2</sub> T <sub>x</sub> /CNF    | 2  | MX/CNF | Cellulose      | 0.047    | 25.8    |
| Ti <sub>3</sub> C <sub>2</sub> T <sub>x</sub> areogel | 3  | MX/gel | Bulk           | 1        | 44.8    |
| Ti <sub>3</sub> CNT <sub>x</sub>                      | 4  | MXN    | Bulk           | 1        | 42.3    |

|                                            |    |             |               |       |       |
|--------------------------------------------|----|-------------|---------------|-------|-------|
| Ti2CTx                                     | 5  | Ti2C        | Bulk          | 1     | 48.5  |
| CNT sponge                                 | 6  | CNT/spo     | Bulk          | 2.4   | 20    |
| MWCNT/WPU Composites                       | 7  | CNT/PU/C    | WPU           | 2.3   | 23    |
| CNT/polycarbonate                          | 8  | CNT/PC      | polycarbonate | 2.1   | 39    |
| high structure carbon black (HS-CB)/ABS    | 9  | HSBC/ABS    | ABS           | 1.1   | 20    |
| SWCNT-Polystyrene foam                     | 10 | CNT/PS/foam | PS            | 1.2   | 18.5  |
| carbon black filled EPDM                   | 11 | CB/EPDM     | EPDM          | 2     | 18    |
| Polypropylene/Stainless-Steel              | 12 | PP/SS       | PP            | 3.1   | 48    |
| Polyetherimide/Graphene                    | 13 | PI/GN       | PEI           | 2.3   | 12.8  |
| Au/GN/Fe3O4/poly(dimethyl siloxane) (PDMS) | 14 | Au/GN/FeO   | PDMS          | 2     | 30.5  |
| Polyimide/ reduced graphene                | 15 | PI/rGN      | PI            | 0.8   | 21    |
| Graphene foam                              | 16 | GN/foam     | Bulk          | 0.3   | 25.2  |
| Graphene/PDMS                              | 17 | GN/PDMS     | PDMS          | 1     | 30    |
| Graphene-Polystyrene                       | 18 | GN/PS       | PS            | 2.5   | 17.3  |
| MXCS                                       | 19 | MXCS        | CF            | 0.386 | 50.5  |
| MXCB                                       | 20 | MXCB        | CF            | 0.398 | 47.6  |
| MWCNT/CNF                                  | 21 | CNT/CNF     | CNF           | 0.138 | 28.22 |
| Polypropylene/carbon fiber                 | 22 | PP/CF       | PP            | 3.1   | 25    |
| PS-Cu nanowire                             | 23 | PS/CuNW     | PS            | 0.21  | 35    |
| MWCNT/ polyurethane                        | 24 | CNT/PU      | PU            | 0.4   | 24.7  |
| Ag/PAN                                     | 25 | Ag/PAN      | PAN           | 0.75  | 40    |
| Ag/BaTiO3                                  | 26 | Ag/BTO      | PVDF          | 1.2   | 21    |
| Au/MWCNT                                   | 27 | Au/CNT      | PVDF          | 0.5   | 26.7  |
| GNP/PLLA                                   | 28 | GNP/PLLA    | PLLA          | 1.5   | 15.5  |
| MWCNT+PP                                   | 29 | CNT/PP      | PP            | 3.2   | 29.47 |
| CF+PP                                      | 30 | CF/PP       | PP            | 3.2   | 19.8  |
| 1 wt% CNT+30 wt% CF+PP                     | 31 | CNT/CF/PP   | PP            | 1     | 16    |
| SWCNTs/Epoxy                               | 32 | CNT/epox    | Epoxy         | 2     | 25    |
| Graphite/PE                                | 33 | G/PE        | PE            | 3     | 33    |
| MXene-PAT-PpAP                             | 34 | MXPATPA     | PAT-PpAP      | 0.62  | 45.18 |
| MXene-PAT-PpAP-PANI                        | 35 | MXPATPNP A  | PAT-PpAP-PANI | 0.8   | 44.08 |

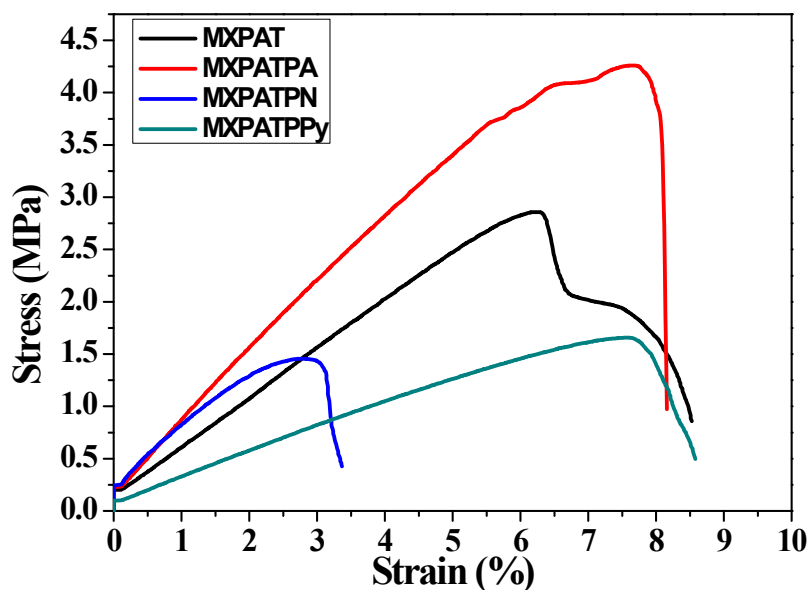

**Figure S9.** Stress and strain curve for composites

Reference.

1. Shahzad, F., Alhabeab, M., Hatter, C.B., Anasori, B., Hong, S.M., Koo, C.M. and Gogotsi, Y., 2016. Electromagnetic interference shielding with 2D transition metal carbides (MXenes). *Science*, 353(6304), pp.1137-1140.
2. Cao, W.T., Chen, F.F., Zhu, Y.J., Zhang, Y.G., Jiang, Y.Y., Ma, M.G. and Chen, F., 2018. Binary strengthening and toughening of MXene/cellulose nanofiber composite paper with nacre-inspired structure and superior electromagnetic interference shielding properties. *ACS nano*, 12(5), pp.4583-4593.
3. Han, M., Yin, X., Hantanasirisakul, K., Li, X., Iqbal, A., Hatter, C.B., Anasori, B., Koo, C.M., Torita, T., Soda, Y. and Zhang, L., 2019. Anisotropic MXene Aerogels with a Mechanically Tunable Ratio of Electromagnetic Wave Reflection to Absorption. *Advanced Optical Materials*, 7(10), p.1900267.
4. Crespo, M., González, M., Elías, A.L., Pulickal Rajukumar, L., Baselga, J., Terrones, M. and Pozuelo, J., 2014. Ultra-light carbon nanotube sponge as an efficient electromagnetic shielding material in the GHz range. *physica status solidi (RRL)–Rapid Research Letters*, 8(8), pp.698-704.
5. Zeng, Z., Jin, H., Chen, M., Li, W., Zhou, L. and Zhang, Z., 2016. Lightweight and anisotropic porous MWCNT/WPU composites for ultrahigh performance electromagnetic interference shielding. *Advanced Functional Materials*, 26(2), pp.303-310.
6. Crespo, M., Méndez, N., González, M., Baselga, J. and Pozuelo, J., 2014. Synergistic effect of magnetite nanoparticles and carbon nanofibres in electromagnetic absorbing composites. *Carbon*, 74, pp.63-72.
7. Wan, Y.J., Zhu, P.L., Yu, S.H., Sun, R., Wong, C.P. and Liao, W.H., 2017. Ultralight, super-elastic and volume-preserving cellulose fiber/graphene aerogel for high-performance electromagnetic interference shielding. *Carbon*, 115, pp.629-639.

8. Pande, S., Chaudhary, A., Patel, D., Singh, B.P. and Mathur, R.B., 2014. Mechanical and electrical properties of multiwall carbon nanotube/polycarbonate composites for electrostatic discharge and electromagnetic interference shielding applications. *Rsc Advances*, 4(27), pp.13839-13849.
9. Al-Saleh, M.H., Saadeh, W.H. and Sundararaj, U., 2013. EMI shielding effectiveness of carbon based nanostructured polymeric materials: a comparative study. *Carbon*, 60, pp.146-156.
10. Shen, B., Li, Y., Zhai, W. and Zheng, W., 2016. Compressible graphene-coated polymer foams with ultralow density for adjustable electromagnetic interference (EMI) shielding. *ACS applied materials & interfaces*, 8(12), pp.8050-8057.
11. Yang, Y., Gupta, M.C., Dudley, K.L. and Lawrence, R.W., 2005. Novel carbon nanotube–polystyrene foam composites for electromagnetic interference shielding. *Nano letters*, 5(11), pp.2131-2134.
12. Ghosh, P. and Chakrabarti, A., 2000. Conducting carbon black filled EPDM vulcanizates: assessment of dependence of physical and mechanical properties and conducting character on variation of filler loading. *European Polymer Journal*, 36(5), pp.1043-1054.
13. Ameli, A., Nofar, M., Wang, S. and Park, C.B., 2014. Lightweight polypropylene/stainless-steel fiber composite foams with low percolation for efficient electromagnetic interference shielding. *ACS applied materials & interfaces*, 6(14), pp.11091-11100.
14. Ling, J., Zhai, W., Feng, W., Shen, B., Zhang, J. and Zheng, W.G., 2013. Facile preparation of lightweight microcellular polyetherimide/graphene composite foams for electromagnetic interference shielding. *ACS applied materials & interfaces*, 5(7), pp.2677-2684.
15. Li, Q., Chen, L., Ding, J., Zhang, J., Li, X., Zheng, K., Zhang, X. and Tian, X., 2016. Open-cell phenolic carbon foam and electromagnetic interference shielding properties. *Carbon*, 104, pp.90-105.
16. Sun, Y., Luo, S., Sun, H., Zeng, W., Ling, C., Chen, D., Chan, V. and Liao, K., 2018. Engineering closed-cell structure in lightweight and flexible carbon foam composite for high-efficient electromagnetic interference shielding. *Carbon*, 136, pp.299-308.
17. Li, Y., Pei, X., Shen, B., Zhai, W., Zhang, L. and Zheng, W., 2015. Polyimide/graphene composite foam sheets with ultrahigh thermostability for electromagnetic interference shielding. *RSC Adv* 5 (31): 24342–24351. *J Mater Chem C*, 3(26), pp.6589-6599.
18. Shen, B., Li, Y., Yi, D., Zhai, W., Wei, X. and Zheng, W., 2016. Microcellular graphene foam for improved broadband electromagnetic interference shielding. *Carbon*, 102, pp.154-160.
19. Raagulan, K., Braveenth, R., Ro Lee, L., Lee, J., Kim, B.M., Moon, J.J., Lee, S.B. and Chai, K.Y., 2019. Fabrication of Flexible, Lightweight, Magnetic Mushroom Gills and Coral-Like MXene–Carbon Nanotube Nanocomposites for EMI Shielding Application. *Nanomaterials*, 9(4), p.519.
20. Ameli, A., Nofar, M., Wang, S. and Park, C.B., 2014. Lightweight polypropylene/stainless-steel fiber composite foams with low percolation for efficient electromagnetic interference shielding. *ACS applied materials & interfaces*, 6(14), pp.11091-11100.

21. Li, H., Yuan, D., Li, P. and He, C., 2019. High conductive and mechanical robust carbon nanotubes/waterborne polyurethane composite films for efficient electromagnetic interference shielding. *Composites Part A: Applied Science and Manufacturing*, 121, pp.411-417.
22. Li, J., Peng, W.J., Fu, Z.J., Tang, X.H., Wu, H., Guo, S. and Wang, M., 2019. Achieving high electrical conductivity and excellent electromagnetic interference shielding in poly (lactic acid)/silver nanocomposites by constructing large-area silver nanoplates in polymer matrix. *Composites Part B: Engineering*, 171, pp.204-213.
23. Shajari, S., Arjmand, M., Pawar, S.P., Sundararaj, U. and Sudak, L.J., 2019. Synergistic effect of hybrid stainless steel fiber and carbon nanotube on mechanical properties and electromagnetic interference shielding of polypropylene nanocomposites. *Composites Part B: Engineering*, 165, pp.662-670.
24. Wang, L., Qiu, H., Liang, C., Song, P., Han, Y., Han, Y., Gu, J., Kong, J., Pan, D. and Guo, Z., 2019. Electromagnetic interference shielding MWCNT-Fe<sub>3</sub>O<sub>4</sub>@ Ag/epoxy nanocomposites with satisfactory thermal conductivity and high thermal stability. *Carbon*, 141, pp.506-514.
